# Supplementary material for: Understanding COVID: Collaborative Government Campaign for Citizen Digital Health Literacy in the COVID-19 Pandemic
Source: MDPI journal article supplement (doi:10.3390/life13020589), 2023-02-20
Supplement: s1 [file s1]

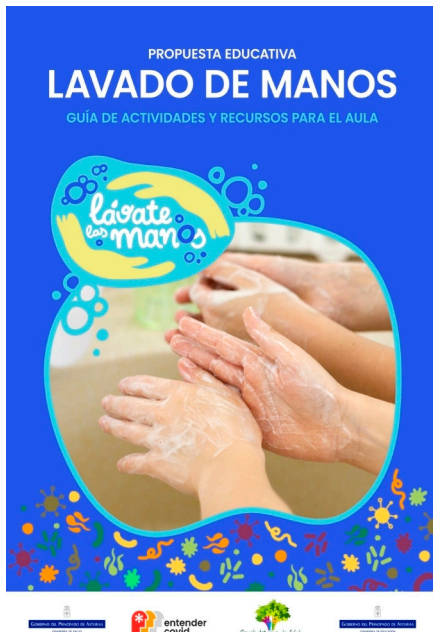

## Canción "Bichos fuera"

LETRA

Un minutín tienes que gastar  
Y las manos perillímpies tendrás  
Por munchu xatu n'enxabonar  
Fallo guapo con esti cantar

Los virus así desapaecearán  
cuidándose xuntos pa nun enfermár  
Los virus así desapaecearán, los  
bichos p'afuera los vamos echar

A un xuegu nuevu vamos xugar  
Dando palmes pero per detrás  
Unes coxquilles que prestarán  
Y les uñes te van tellumar

Los virus así desapaecearán  
cuidándose xuntos pa nun enfermár  
Los virus así desapaecearán, los  
bichos p'afuera los vamos echar

Garrái muñón y entama a frotar  
Como si lu fueres a enroscar  
Nun escaezas yá pa finir  
Les moñeques que toca esclucar

Los virus así desapaecearán  
cuidándose xuntos pa nun enfermár  
Los virus así desapaecearán, los  
xuntos y xuntos los vamos echar

6

## Bichos Fuera

Voz.

Composición: Miguel Áxel Montenegro

Transcripción: Inés Estrada Vázquez

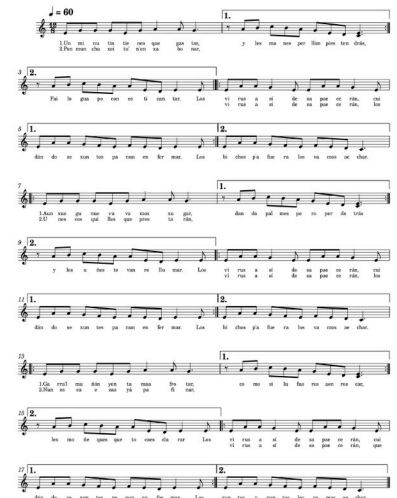

Supplementary Figure S1. School material from the "Bichos fuera" (Bugs out!) campaign

### Aire de primera

BUENAS PRÁCTICAS PARA UN ENTORNO SEGURO

GOBIERNO DEL PRINCIPADO DE ASTURIAS  
CONSEJERÍA DE SALUD

Aire de primera  
entender covid  
GOBIERNO DEL PRINCIPADO DE ASTURIAS  
CONSEJERÍA DE SALUD

**1. ESPACIOS AL AIRE LIBRE**  
Prioriza las actividades de exterior siempre que sea posible, especialmente si quieres comer y beber o hacer ejercicio físico.

**2. CALIDAD DEL AIRE QUE RESPIRAMOS**  
El sistema de medición de CO<sub>2</sub> permite comprobar que la renovación del aire es adecuada. No debemos superar los 700-800 ppm.

**3. MEJOR CON VENTILACIÓN NATURAL**  
Más efectiva aún si es cruzada, continua y distribuida en varios puntos.

**4. VENTILACIÓN FORZADA, SIN RECIRCULAR**  
Si no es suficiente con la ventilación natural, debe aumentarse el suministro de aire exterior y mejor si es de forma continua.

**5. ASEOS**  
Baja la tapa del inodoro antes de salir de la caseta. Mantén la puerta cerrada en todo momento. Además, evita secadores de aire y pasa el menor tiempo posible en su interior. Mejor, espera fuera.

**6. PURIFICADORES**  
Solo cuando no se consiga una renovación efectiva con la ventilación natural y mecánica, se instalan purificadores como última medida. El personal técnico instalará los purificadores con filtros HEPA, H13, de acuerdo al tamaño del local.

**7. MEJOR SIN MÚSICA**  
En la medida de lo posible, evita poner música dentro de los locales para no tener que hablar en voz más alta pues favorece la difusión del virus.

**AYÚDANOS A MANTENER UN ENTORNO SEGURO**  
**Baja la tapa para que no se escapen.**

**AYÚDANOS A MANTENER UN ENTORNO SEGURO**  
**BAJA LA TAPA PARA QUE NO SE ESCAPEN.**

**AYÚDANOS A MANTENER UN ENTORNO SEGURO**  
**MANTÉN LA PUERTA CERRADA EN TODO MOMENTO.**

**AYÚDANOS A MANTENER UN ENTORNO SEGURO**  
**EVITA SECADORES DE AIRE.**

**AYÚDANOS A MANTENER UN ENTORNO SEGURO**  
**PASA EL MENOR TIEMPO POSIBLE EN EL ASEO.**

Aire de primera  
entender covid  
www.entendercovid.es/aire-de-primera  
\* Aire de primera es una iniciativa de la Consejería de Salud de Asturias.

Supplementary Figure S2 "Aire de Primera" (First Quality Air) poster
